# Supplementary material
Source: publisher figshare collection journal article supplement (https://acs.figshare.com/ndownloader/files/4210996)
Supplement: Supplementary file 1 [file 4210996]

## Electronic Supplementary Information

### **Photocatalytic Reduction of Carbon Dioxide over Ag Cocatalyst-Loaded $\text{ALa}_4\text{Ti}_4\text{O}_{15}$ (A=Ca, Sr, and Ba) Using Water as a Reducing Reagent**

Kosuke Iizuka,<sup>†</sup> Tomoaki Wato,<sup>†</sup> Yugo Miseki,<sup>†</sup> Kenji Saito,<sup>†,‡</sup> and Akihiko Kudo<sup>\*,†,‡</sup>

<sup>†</sup>Department of Applied Chemistry, Faculty of Science, Tokyo University of Science, 1-3 Kagurazaka, Shinjuku-ku, Tokyo 162-8601, Japan

<sup>‡</sup>Division of Photocatalyst for Energy and Environment, Research Institute of Science and Technology, Tokyo University of Science, 1-3 Kagurazaka, Shinjuku-ku, Tokyo 162-8601, Japan

E-mail: a-kudo@rs.kagu.tus.ac.jp

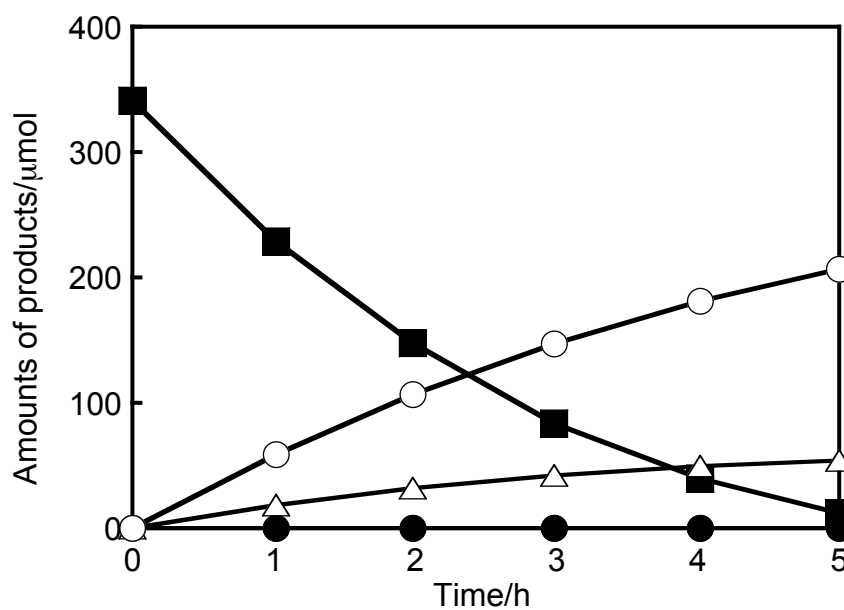

**Figure S1.** Decomposition of HCOOH over a bare BaLa<sub>4</sub>Ti<sub>4</sub>O<sub>15</sub> photocatalyst in an aqueous medium. Catalyst: 0.3 g, water: 360 ml, Ar flow system (15 mL min<sup>-1</sup>), a 400W high pressure mercury lamp, an inner irradiation quartz cell, HCOOH (■), H<sub>2</sub> (○), O<sub>2</sub> (●), CO (△).

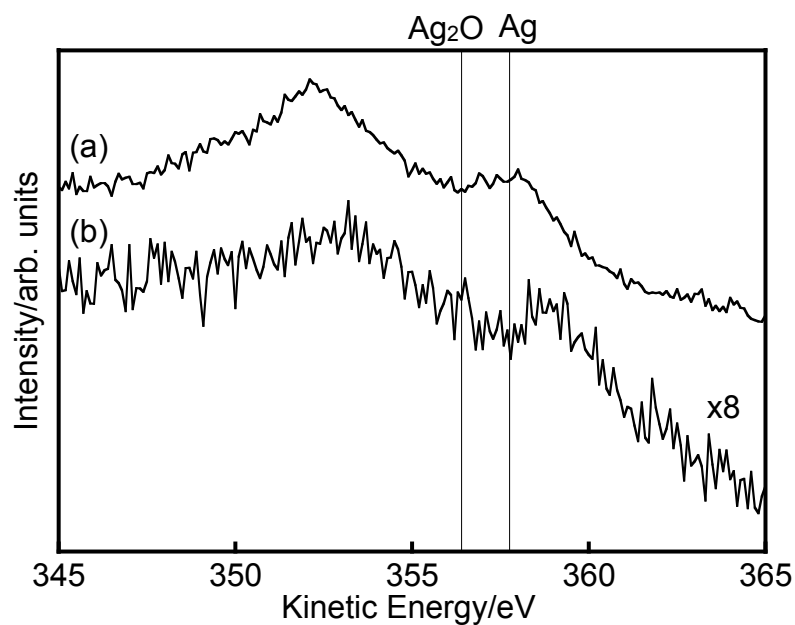

**Figure S2.**  $\text{Ag}(\text{M}_4\text{N}_{4.5}\text{N}_{4.5})$  Auger spectra of  $\text{BaLa}_4\text{Ti}_4\text{O}_{15}$  photocatalyst loaded with Ag (2 wt%) by a liquid-phase chemical reduction method (a) before and (b) after 20 hours of photocatalytic reaction. The kinetic energy due to Ag and  $\text{Ag}_2\text{O}$  was obtained from reference S2.

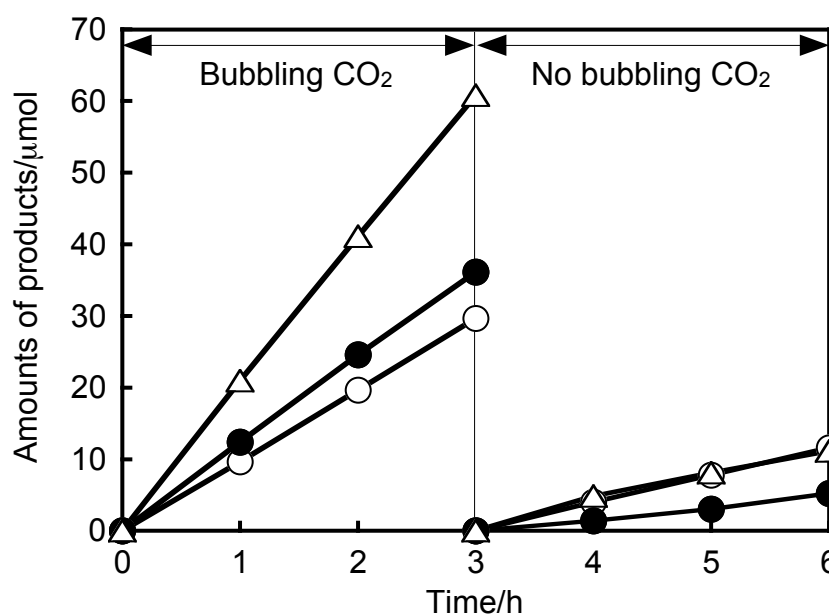

**Figure S3.** Photocatalytic CO<sub>2</sub> reduction over Ag(2 wt%)/BaLa<sub>4</sub>Ti<sub>4</sub>O<sub>15</sub> with and without bubbling CO<sub>2</sub> gas. Catalyst: 0.3 g, water: 350 ml, CO<sub>2</sub> flow system (15 mL min<sup>-1</sup>), a 400W high pressure mercury lamp, an inner irradiation quartz cell, H<sub>2</sub> (○), O<sub>2</sub> (●), CO (△).

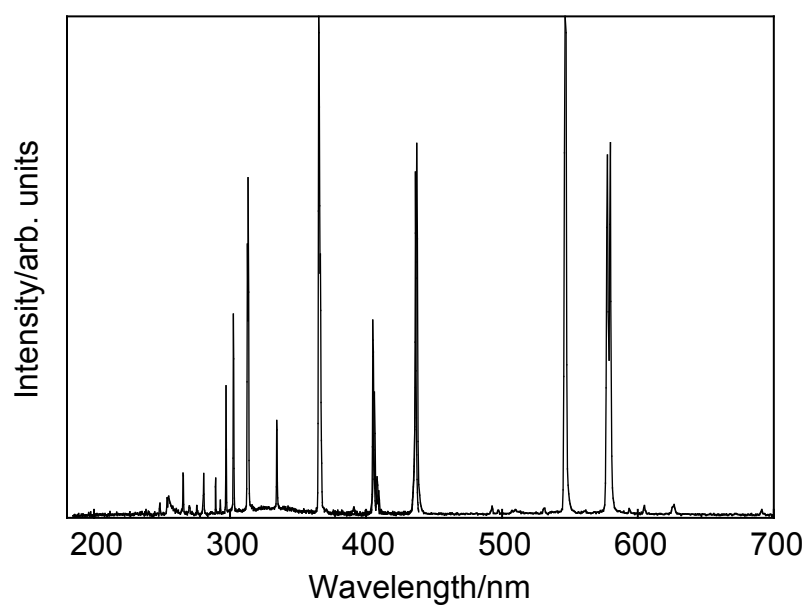

**Figure S4.** A spectrum of incident light from a light source of a 400 W high-pressure mercury lamp + a quartz cell.
